# Supplementary material for: Direct RT-qPCR detection of SARS-CoV-2 RNA from patient nasopharyngeal swabs without an RNA extraction step
Source: PLoS Biol. 2020 Oct 2;18(10):e3000896. doi: 10.1371/journal.pbio.3000896 (PMC7556528; doi:10.1371/journal.pbio.3000896)
Supplement: S2 Table — A) CT values from COVID-19 patient NP swabs or non-COVID-19 patient NP swabs following direct RT-qPCR versus standard RT-qPCR for SARS-CoV-2 RNA detection that included RNA extraction. A total of 90 NP swab samples representing low SARS-CoV-2 RNA loads (CT values of 27 to 36) or non-detected (i.e., negative) SARS-COV-2 RNA as determined by clinical RT-qPCR at UW in Seattle (labeled “original clinical RT-qPCR”) were analyzed by the indicated methods to establish the limit of detection and specificity of the direct RT-qPCR method. Direct RT-qPCR was performed on 3 µl of NP swab diluent after heating for 10 minutes at 95°C. In parallel, RNA was extracted from 200 µl of NP swab diluent (per the UW standard clinical protocol) that had been previously heated at 95°C, and RNA representing 20 µl of the original diluent was used in RT-qPCR. Samples below the limit of detection (CT of 40 or more) are designated “NEG.” These data are linked to Fig 3. B) CT values from COVID-19 patient NP swabs or non-COVID-19 patient NP swabs following direct RT-qPCR versus standard RT-qPCR for EXO RNA that was spiked into the swab diluent. A total of 90 NP swab samples representing low SARS-CoV-2 RNA loads (CT values of 27 to 36) or non-detected (i.e., negative) SARS-COV-2 RNA as determined by clinical RT-qPCR at UW in Seattle were analyzed by the indicated methods. For the donors indicated, an aliquot of swab diluent was spiked with 4 × 104 copies of EXO control RNA prior to RNA extraction or direct addition of sample to the RT-qPCR reaction for subsequent detection with an EXO primer/probe set. Direct RT-qPCR was performed on 3 µl of NP swab diluent after heating for 10 minutes at 95°C. In parallel, RNA was also extracted from 200 µl of NP swab diluent (per the UW standard clinical protocol) that had been previously heated at 95°C for 10 minutes, and RNA representing 20 µl of the original diluent was used in RT-qPCR. Samples below the limit of detection (CT of 40 or more) are designated “NE [file pbio.3000896.s002.xlsx]

## Sheet: S2A Table
S2A Table. CT values from COVID-19 patient NP swabs or non-COVID-19 patient NP swabs following direct RT-qPCR versus standard RT-qPCR for SARS-CoV-2 RNA detection that includes RNA extraction. 90 NP swab samples representing low SARS-CoV-2 RNA loads (CT values of 27 to 36) or non-detected (e.g. negative) SARS-COV-2 RNA as determined by clinical RT-qPCR at UW in Seattle (labeled “original clinical…
		Original clinical RT-qPCR (20 µL swab diluent equivalent)	Direct RT-PCR (3 µL swab diluent)	Standard RT-qPCR (20 µL swab diluent equivalent)
	NP Swab Donor	No Heat	95oC	95oC
		N2	N2	N2
Experiment #4	1	27.03	38.4493	26.8193
	2	27.05	38.467	26.5136
	3	27.12	36.7042	25.843
	4	27.15	35.8519	27.715
	5	27.34	31.7763	26.3411
	6	27.43	34.9515	25.6838
	7	27.45	NEG	26.1379
	8	27.59	39.4152	28.4636
	9	27.93	35.3346	26.9314
	10	28.15	37.1508	26.9221
	11	28.63	34.9343	28.5731
	12	29.55	37.8008	29.6403
	13	29.81	NEG	30.784
	14	30.24	NEG	30.424
	15	30.38	NEG	29.9096
	16	30.67	39.7624	31.3003
	17	31.05	39.8026	31.5961
	18	31.17	NEG	32.0339
	19	31.26	NEG	31.6231
	20	31.39	NEG	31.8189
	21	31.8	NEG	32.6889
	22	31.85	NEG	39.0557
	23	32.59	39.3735	29.9889
	24	32.73	NEG	35.6335
	25	32.79	NEG	32.4991
	26	32.82	NEG	33.2248
	27	32.9	NEG	31.0485
	28	33.06	NEG	33.9298
	29	33.29	NEG	32.3777
	30	33.4	NEG	33.838
	31	33.57	NEG	33.0563
	32	33.63	NEG	32.9035
	33	33.85	NEG	32.1211
	34	33.93	NEG	35.1886
	35	34.14	NEG	36.731
	36	34.29	NEG	34.8582
	37	34.32	NEG	36.1135
	38	34.39	NEG	33.7901
	39	34.49	NEG	38.1992
	40	34.68	NEG	34.0314
	41	34.84	NEG	34.3001
	42	34.92	NEG	34.1109
	43	35.1	NEG	36.2186
	44	35.19	NEG	35.3817
	45	35.24	NEG	34.0848
	46	35.3	NEG	36.04
	47	35.35	NEG	35.5021
	48	35.47	NEG	34.9875
	49	35.49	NEG	34.1234
	50	35.49	NEG	34.7221
	51	35.5	NEG	35.6627
	52	35.58	NEG	35.8557
	53	35.59	NEG	36.5348
	54	35.74	NEG	35.8832
	55	35.99	NEG	36.643
	56	36.03	NEG	38.6305
	57	36.17	NEG	33.9657
	58	36.26	NEG	35.5591
	59	36.33	NEG	NEG
	60	36.39	NEG	38.1106
	61	NEG	NEG	NEG
	62	NEG	NEG	NEG
	63	NEG	NEG	NEG
	64	NEG	NEG	NEG
	65	NEG	NEG	NEG
	66	NEG	NEG	NEG
	67	NEG	NEG	NEG
	68	NEG	NEG	NEG
	69	NEG	NEG	NEG
	70	NEG	NEG	NEG
	71	NEG	NEG	NEG
	72	NEG	NEG	NEG
	73	NEG	NEG	NEG
	74	NEG	NEG	NEG
	75	NEG	NEG	NEG
	76	NEG	NEG	NEG
	77	NEG	NEG	NEG
	78	NEG	NEG	NEG
	79	NEG	NEG	NEG
	80	NEG	NEG	NEG
	81	NEG	NEG	NEG
	82	NEG	NEG	NEG
	83	NEG	NEG	NEG
	84	NEG	NEG	NEG
	85	NEG	NEG	NEG
	86	NEG	NEG	NEG
	87	NEG	NEG	NEG
	88	NEG	NEG	NEG
	89	NEG	NEG	NEG
	90	NEG	NEG	NEG

## Sheet: S2B Table
S2B Table. CT values from COVID-19 patient NP swabs or non-COVID-19 patient NP swabs following direct RT-qPCR versus standard RT-qPCR for EXO RNA that was spiked into the swab diluent. 90 NP swab samples representing low SARS-CoV-2 RNA loads (CT values of 27 to 36) or non-detected (e.g. negative) SARS-COV-2 RNA as determined by clinical RT-qPCR at UW in Seattle were analyzed by the indicated meth…
		Direct RT-PCR (3 µL swab diluent)	Standard RT-qPCR (20 µL swab diluent equivalent)
	NP Swab Donor	95oC	95oC
		EXO	EXO
Experiment #4	1	26.2409	25.8948
	2	25.4248	27.8351
	3	26.0343	26.377
	4	25.6027	26.9211
	5	26.1502	26.4031
	6	25.5259	26.559
	7	25.7291	26.3302
	8	25.8583	26.7439
	9	26.0296	27.3349
	10	26.4922	27.6428
	11	25.2142	26.8763
	12	26.2042	26.8047
	13	25.6907	26.9359
	14	25.8643	26.8164
	15	26.6132	28.7282
	16	26.5664	26.665
	17	25.9649	27.2581
	18	25.8993	27.5045
	19	26.1847	26.6864
	20	25.0605	27.0329
	21	27.5958	27.2137
	22	NEG	27.0443
	23	27.1468	26.4406
	24	26.0672	29.0571
	25	26.5599	26.9341
	26	26.6692	27.4313
	27	26.7576	28.3495
	28	27.1234	27.0127
	29	25.7718	27.4407
	30	26.0745	27.103
	31	27.1813	27.2991
	32	26.3147	26.1354
	33	26.2506	27.2206
	34	25.4341	27.1957
	35	26.5141	26.6701
	36	26.4822	26.7091
	37	25.8751	26.8791
	38	26.253	27.3393
	39	26.7161	26.9641
	40	26.5683	26.7635
	41	26.1081	27.2178
	42	25.8721	27.005
	43	25.8388	27.1848
	44	27.449	26.6402
	45	26.4901	26.9376
	46	26.8574	27.0331
	47	26.1947	26.5445
	48	27.1765	27.1066
	49	26.919	26.6981
	50	26.8973	27.2367
	51	26.46	26.787
	52	26.3364	27.0246
	53	26.1837	26.9553
	54	26.1293	27.1856
	55	26.3007	26.8095
	56	26.0187	27.1731
	57	26.9346	27.2174
	58	26.2902	27.319
	59	26.6936	26.9201
	60	26.8721	26.8611
	61	25.8017	27.0628
	62	28.4906	27.4474
	63	26.5598	26.9554
	64	28.5003	27.1347
	65	26.7848	27.3387
	66	27.6369	27.0703
	67	27.0217	27.1353
	68	27.7801	27.0009
	69	25.2761	27.4695
	70	NEG	27.3715
	71	27.2172	29.2035
	72	27.6217	27.3604
	73	27.561	27.7443
	74	27.6333	27.8191
	75	26.9166	27.4026
	76	27.3928	27.2976
	77	26.0209	26.7835
	78	25.6367	27.0216
	79	28.439	27.3296
	80	27.5869	27.268
	81	25.4074	27.537
	82	27.4801	27.7766
	83	26.9594	27.3568
	84	27.5742	26.8866
	85	26.73	26.9308
	86	26.9838	27.3512
	87	26.8966	27.1455
	88	27.4802	27.6201
	89	27.1147	27.268
	90	27.1981	27.7283
